# Supplementary material
Source: PubMed Central journal article supplement (PMC3310502)

## SUPPLEMENTARY DATA

FIG. S1. A comparison of the PCA ordinations for hydrophyte growth forms represented by only one or two species (coloured circles) within the context of terrestrial herbaceous plant trait variation (grey circles).

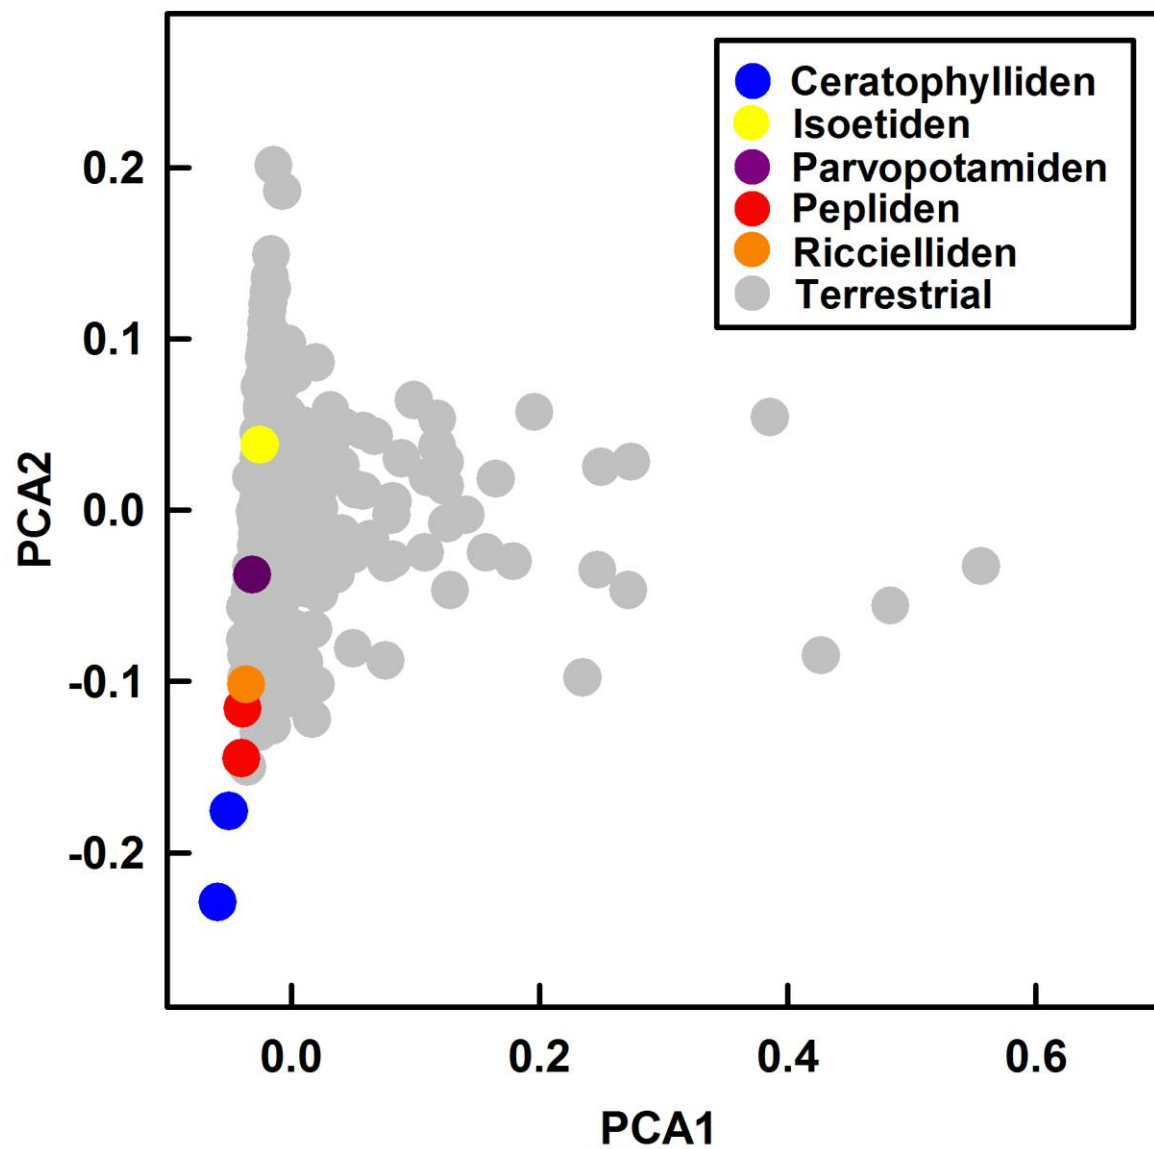

Supplement: supp_mcs021_mcs021supp_fig.pdf [file supp_mcs021_mcs021supp_fig.pdf]
